# Supplementary material for: Photofunctional hybrids of TiO2 and titanium metal–organic frameworks for dye degradation and lanthanide ion-tuned multi-color luminescence
Source: Royal Society of Chemistry journal article supplement (doi:10.1039/c7nj04786j), 2018-01-01
Supplement: c7nj04786j1.pdf [file c7nj04786j1.pdf]

## Supplementary material

### **Photofunctional hybrids of TiO<sub>2</sub> and titanium metal-organic frameworks for dye degradation and lanthanide ions tuned multi- color luminescence**

Shu-Yin Zhu, Bing Yan\*

*School of Chemical Science and Engineering, Tongji University, Shanghai 200092, China*

\* Corresponding author: Email address: [byan@tongji.edu.cn](mailto:byan@tongji.edu.cn) (Bing Yan)

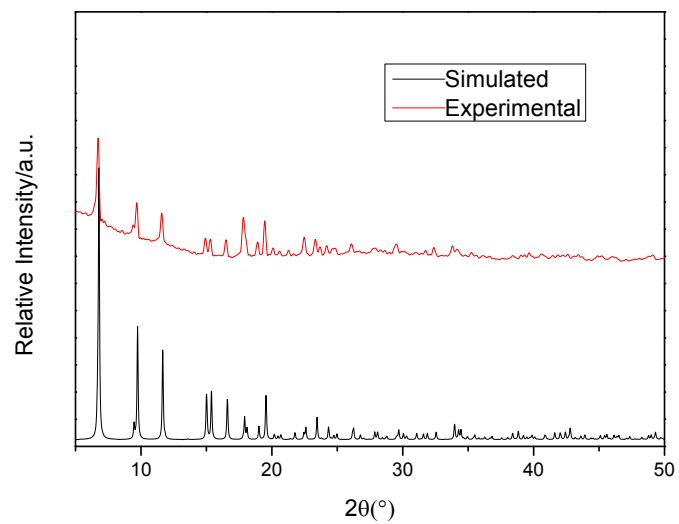

**Figure S1** Powder X-ray diffraction (PXRD) patterns of the experimental and simulated MIL-125(Ti).

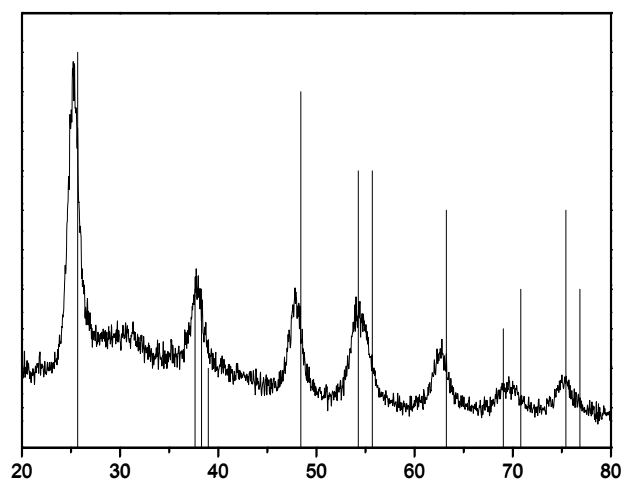

**Figure S2** Powder X-ray diffraction (PXRD) patterns of the experimental and simulated TiO<sub>2</sub>.

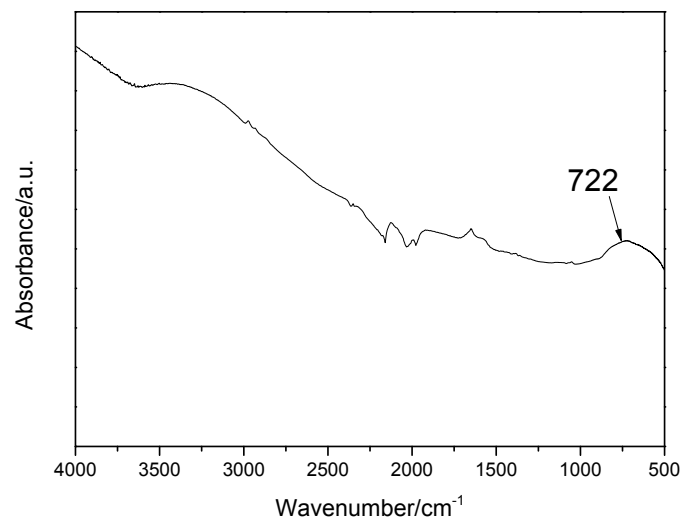

**Figure S3** TEM image of the as-prepared MIL-125(Ti)@TiO<sub>2</sub>

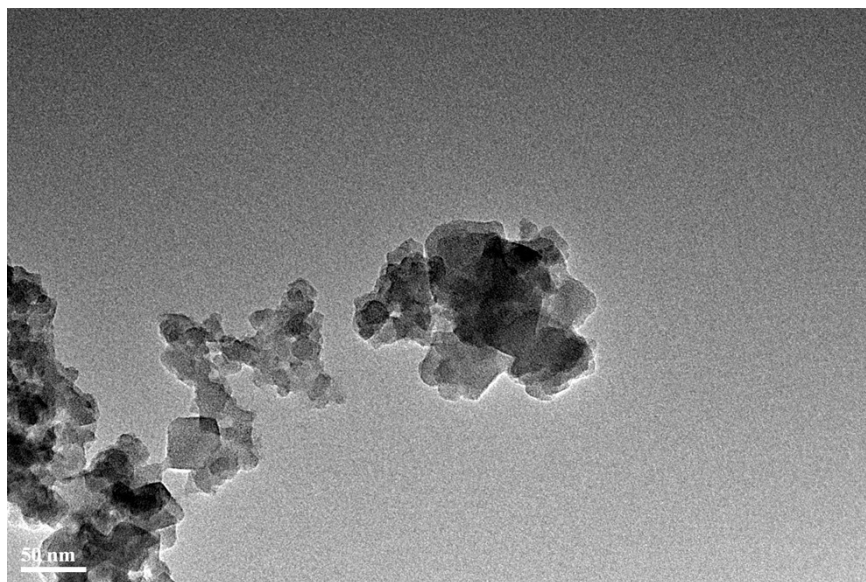

**Figure S4** TEM image of the as-prepared MIL-125(Ti)@TiO<sub>2</sub>

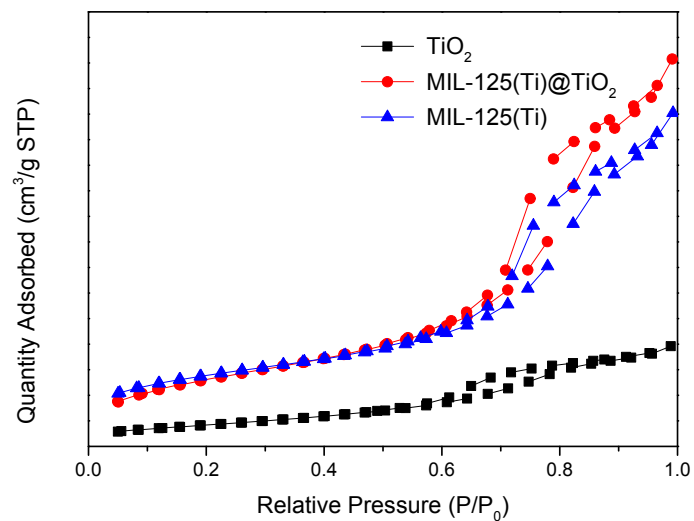

**Figure S5** N<sub>2</sub> adsorption–desorption isotherms of the as-synthesized TiO<sub>2</sub>, MIL-125(Ti) and MIL-125(Ti)@TiO<sub>2</sub>

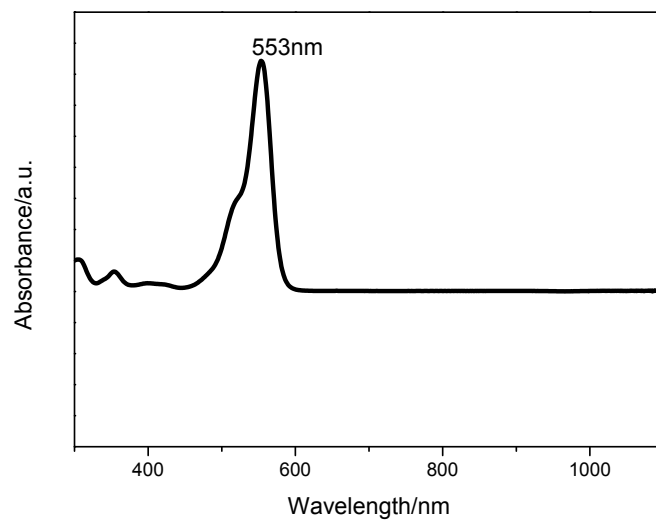

**Figure S6** UV–vis absorption spectrum of Rh B.

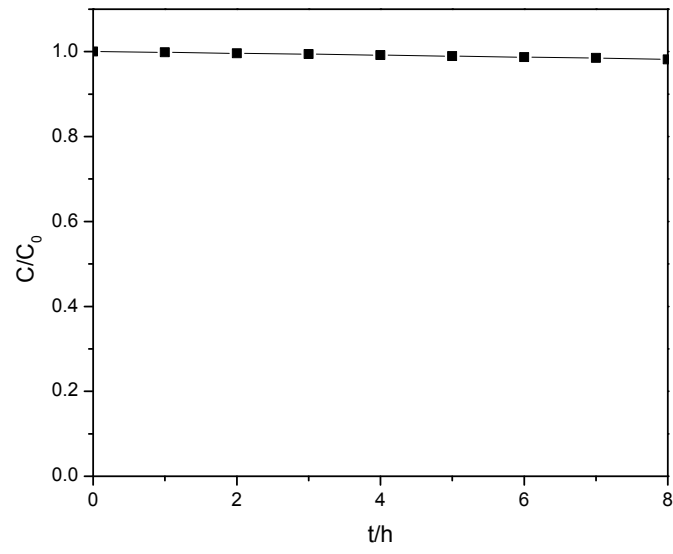

**Figure S7** the removal of Rh B during blank experiment

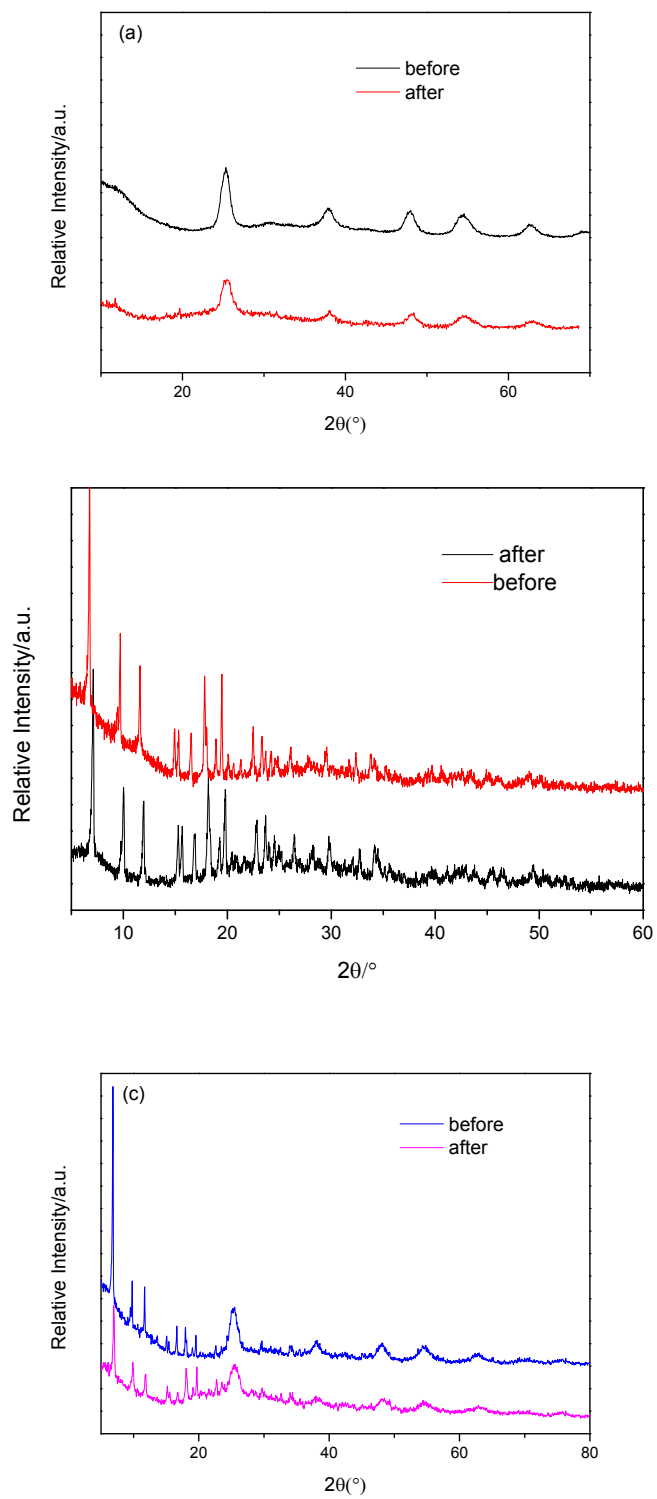

**Figure S8** The powder X-ray diffraction (PXRD) patterns of  $\text{TiO}_2$  (a), MIL-125(Ti) (b) and hybrid MIL-125(Ti)@ $\text{TiO}_2$  (c) before and after the photocatalytic process.

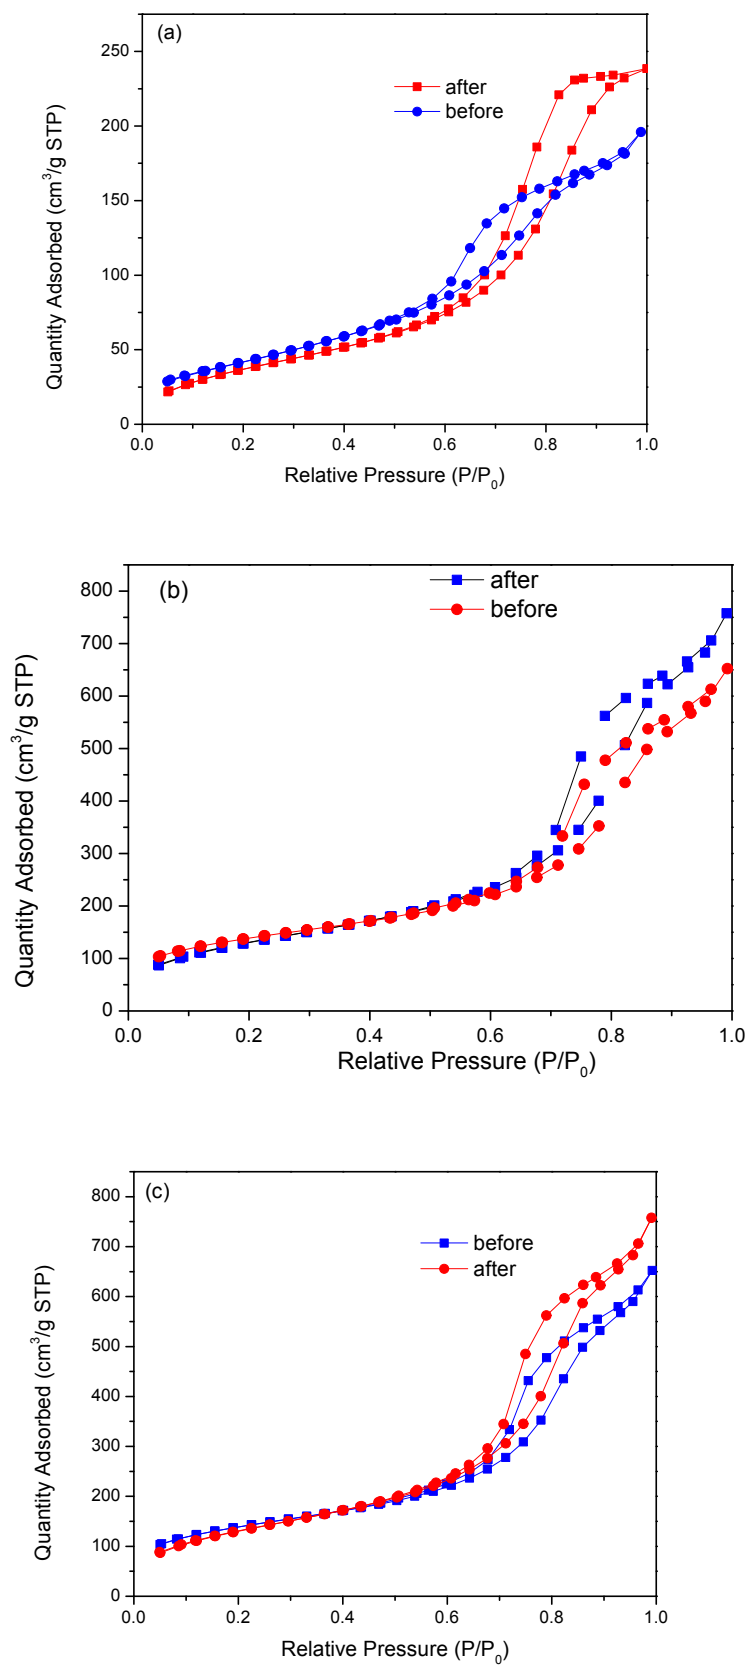

**Figure S9** N<sub>2</sub> adsorption–desorption isotherms of TiO<sub>2</sub> (a), MIL-125(Ti) (b), MIL-125(Ti)@TiO<sub>2</sub> (c) before and after the photocatalytic process

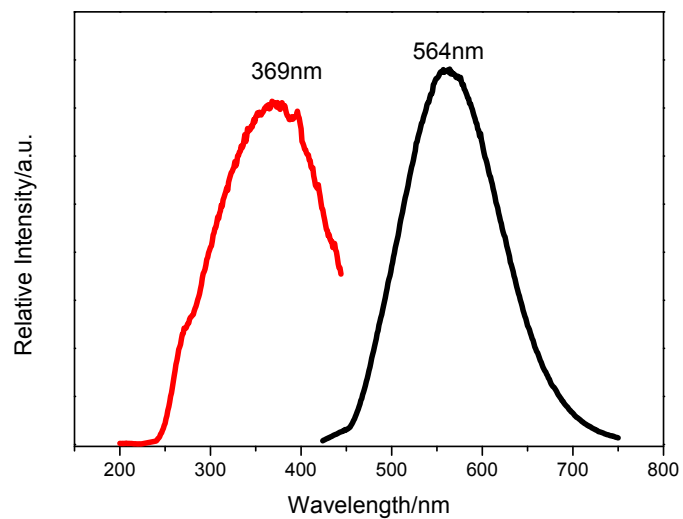

**Figure S10** Room temperature excitation and emission spectra of ligand H<sub>2</sub>BDC-NH<sub>2</sub>

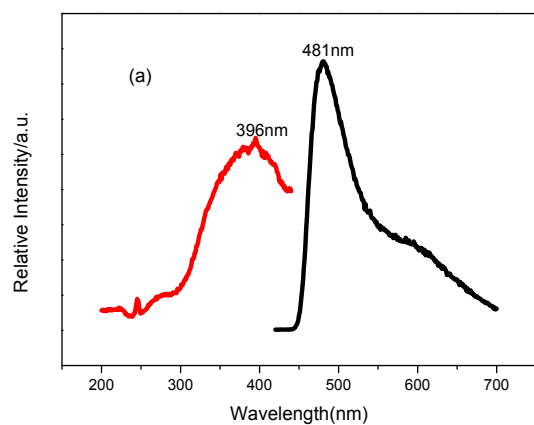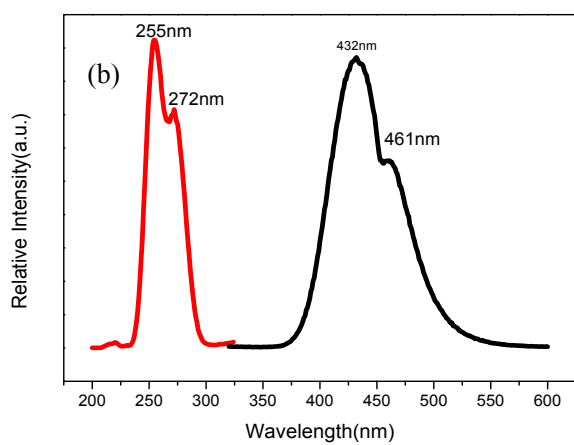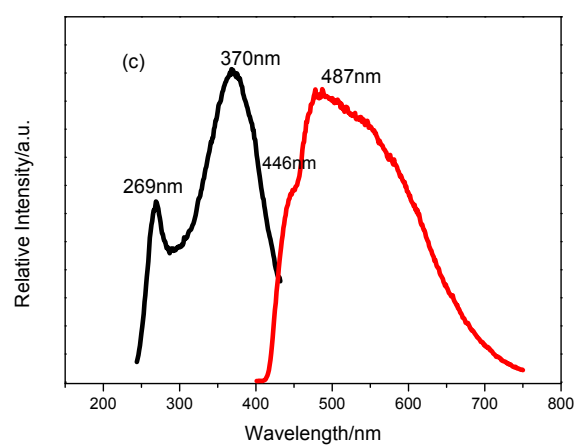

**Figure S11** Room temperature excitation and emission spectra of MIL-125(Ti) (a), TiO<sub>2</sub> (b) and hybrid MIL-125(Ti)@TiO<sub>2</sub>.



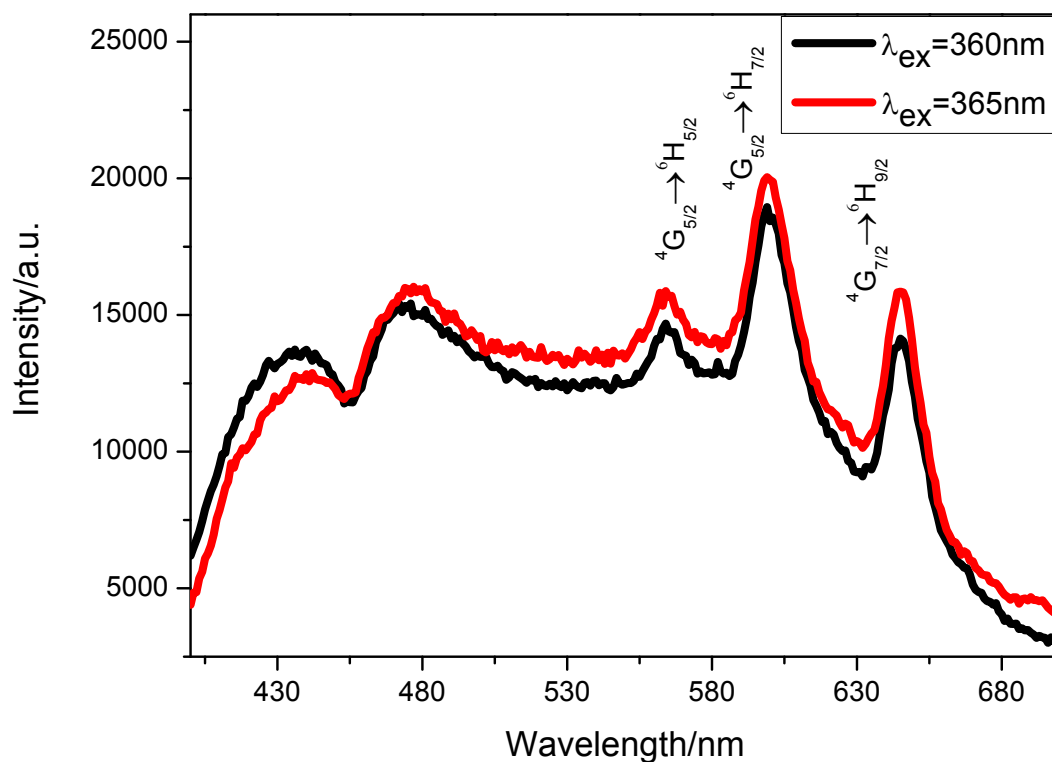

**Figure S12** Emission spectra of Sm@MIL-125(Ti)@TiO<sub>2</sub> at different excitation wavelengths (360 and 365nm).

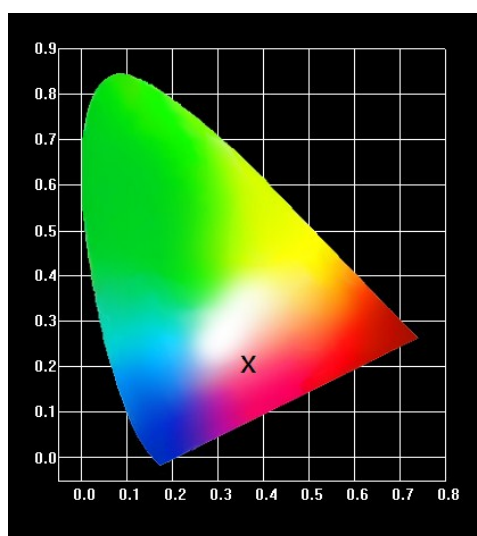

**Figure S13** CIE chromaticity coordinates of the initial Eu@MIL-125(Ti)@TiO<sub>2</sub>

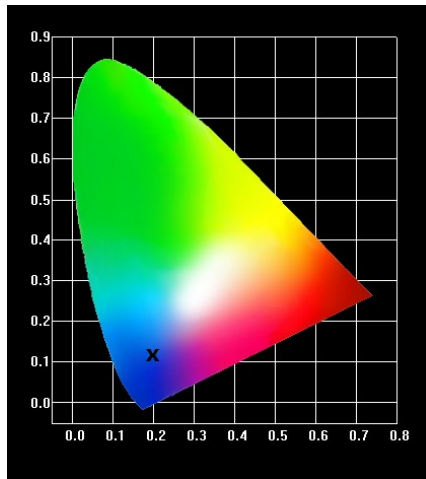

Figure S14 CIE chromaticity coordinates of the hybrid MIL-125(Ti)@TiO<sub>2</sub>

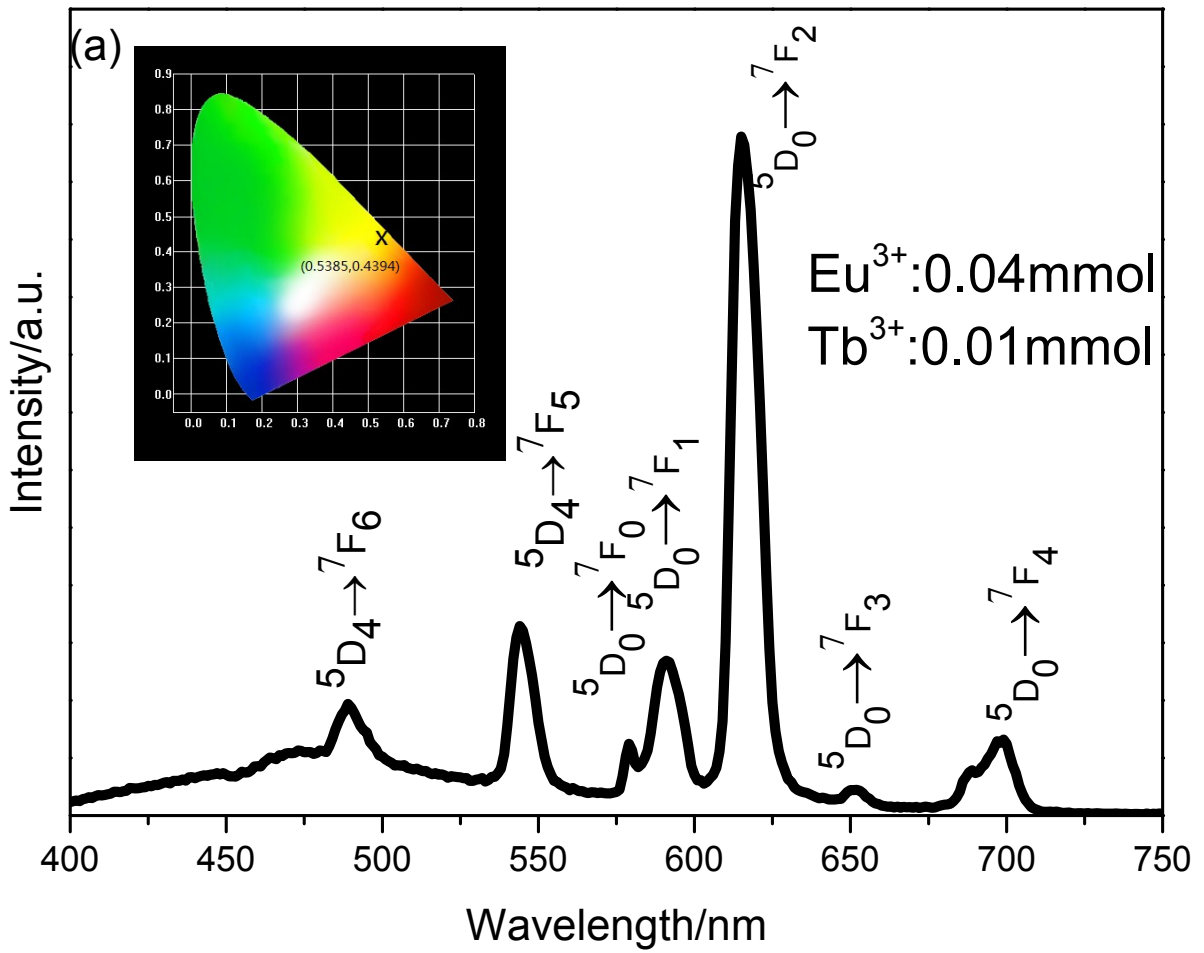

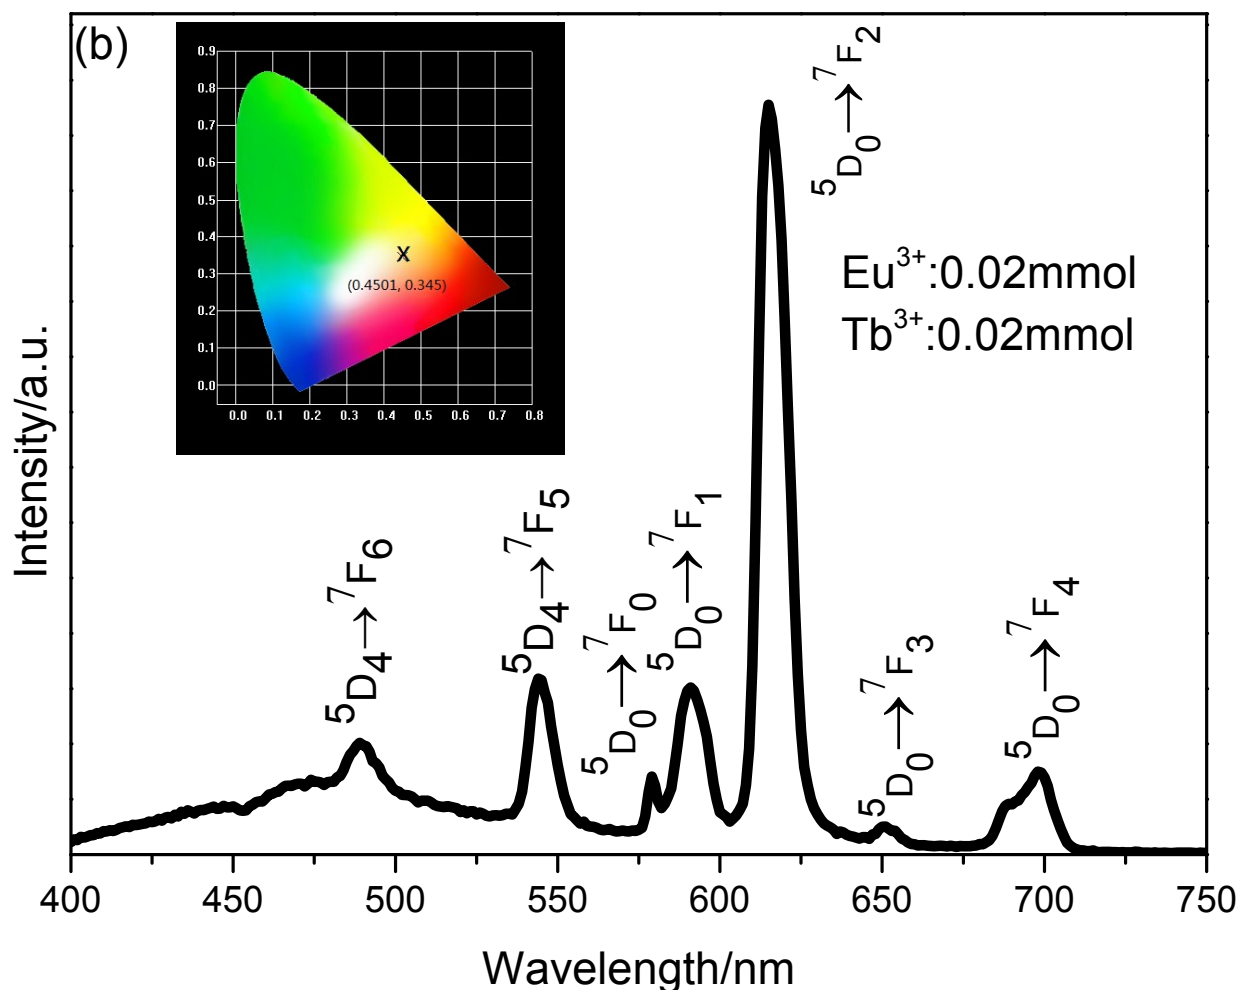

**Figure S15** Different doping ratios of Eu<sup>3+</sup> and Tb<sup>3+</sup> to get the white light integration of the Eu/Tb@ MIL-125(Ti)@TiO<sub>2</sub>

**Table S1** the BET surface area of catalysts before and after the photocatalytic process

| Catalyst Sample              | Before the photocatalytic process/m <sup>2</sup> g <sup>-1</sup> | After the photocatalytic process/m <sup>2</sup> g <sup>-1</sup> |
|------------------------------|------------------------------------------------------------------|-----------------------------------------------------------------|
| TiO <sub>2</sub>             | 158.3238                                                         | 145.7157                                                        |
| MIL-125(Ti)                  | 572.0271                                                         | 562.8334                                                        |
| MIL-125(Ti)@TiO <sub>2</sub> | 483.7462                                                         | 482.1198                                                        |
